# Supplementary material for: Lignin nanoparticles: synthesis, characterization and corrosion protection performance
Source: Royal Society of Chemistry journal article supplement (doi:10.1039/c7nj04103a), 2018-01-01
Supplement: c7nj04103a1.pdf [file c7nj04103a1.pdf]

## **Lignin nanoparticles: Synthesis, characterization and their corrosion protection performance**

Obaid ur Rahman,<sup>a,\*</sup> Shubin Shi,<sup>a</sup> Jiheng Ding,<sup>a</sup> Wong Donglin,<sup>a</sup> Sharif Ahmad<sup>b</sup> and Haibin Yu<sup>a,\*</sup>

- a. Key Laboratory of Marine Materials and Related Technologies, Zhejiang Key Laboratory of Marine Materials and Protective Technologies, Division of surface engineering, Ningbo Institute of Materials Technology and Engineering, Chinese Academy of Sciences, Ningbo, P. R. China
- b. Material Research Laboratory, Department of Chemistry, Jamia Millia Islamia, New Delhi, 110025, India

### **Characterization**

Different analytical techniques were used to characterize the SERSL and LNP. Fourier transform infrared (FTIR), spectra were recorded on a Thermo Nicolet Nexus 6700 FTIR spectrometer using a KBr pellet technique 32 scans per samples were acquired at a resolution of 4 cm<sup>-1</sup> in the range of 4000 to 400 cm<sup>-1</sup>. The proton and carbon nuclear magnetic resonance (<sup>1</sup>H NMR, and <sup>13</sup>C NMR) spectra were recorded on a Bruker 400 MHz AVANCE III NMR spectrometer. For <sup>1</sup>H NMR, 20 mg samples were dissolved in 1 mL of D<sub>2</sub>O and for <sup>13</sup>C NMR, 40 mg of samples were dissolved in D<sub>2</sub>O. All chemical shifts were referenced to tetramethylsilane (TMS) as an internal standard. Transmission electron microscopy (TEM) and scanning electron microscopy (SEM) and elemental analysis were carried out using, JEM-1011 and FEI Quanta FEG 250, respectively. Thermal stabilities of lignin were studied by TGA using PerkinElmer Pyris Diamond instrument under a nitrogen atmosphere at a heating rate of 10 °C min<sup>-1</sup> from 25-800 °C. Tg of SERSL and LNP were determined by differential scanning calorimetry (DSC) using Polyma, Netisch, the heating and cooling of the samples were performed at the rates of 10 °C min<sup>-1</sup> under nitrogen

atmosphere in the temperature range of 30 °C to 200 °C for first run and 0 °C to 250 °C for second run. The contact angles of composites were tested by a contact angle meter (OCA20, Data physics, Germany) and the values were averages of taking at three readings at different place of coated sample surfaces. Electrochemical and potentiodynamic polarization test were performed according to ASTM G 59-97 methods as reported earlier.<sup>1</sup> The corrosion resistance of coated and uncoated samples was investigated in 3.5 wt. % NaCl solution, at room temperature using CHI660D electrochemical workstation. A conventional three-electrode electrochemical cell i.e. test samples as working electrode, Pt gauge as auxiliary electrode and Ag/AgCl as a reference electrode were used for EIS and potentiodynamic polarization studies. The system was supported by electrochemical Zview software which was used to study the electrochemical corrosion behavior, of coated and uncoated substrate. The impedance and Tafel parameters were extracted by Tafel extrapolation method. EIS analysis were carried out in the frequency range of  $10^5 \sim 10^{-1}$  Hz and the sinusoidal voltage signal amplitude was 20 mV. Water absorption ( $\theta$ ) was calculated by coating capacitance obtained from EIS and calculated by the Brasher-Kingsbury equation.<sup>2</sup> Salt spray test (SST) was carried out in a Q-FOG CCT-1100 salt spray cabinet according to the international standard (ASTM B117-09).

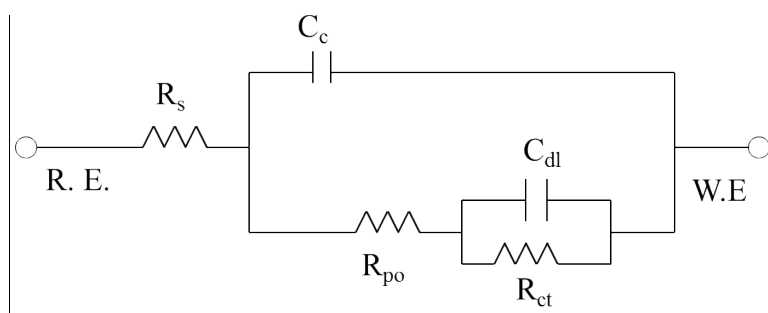

**Figure S1** Equivalent circuit used in EIS

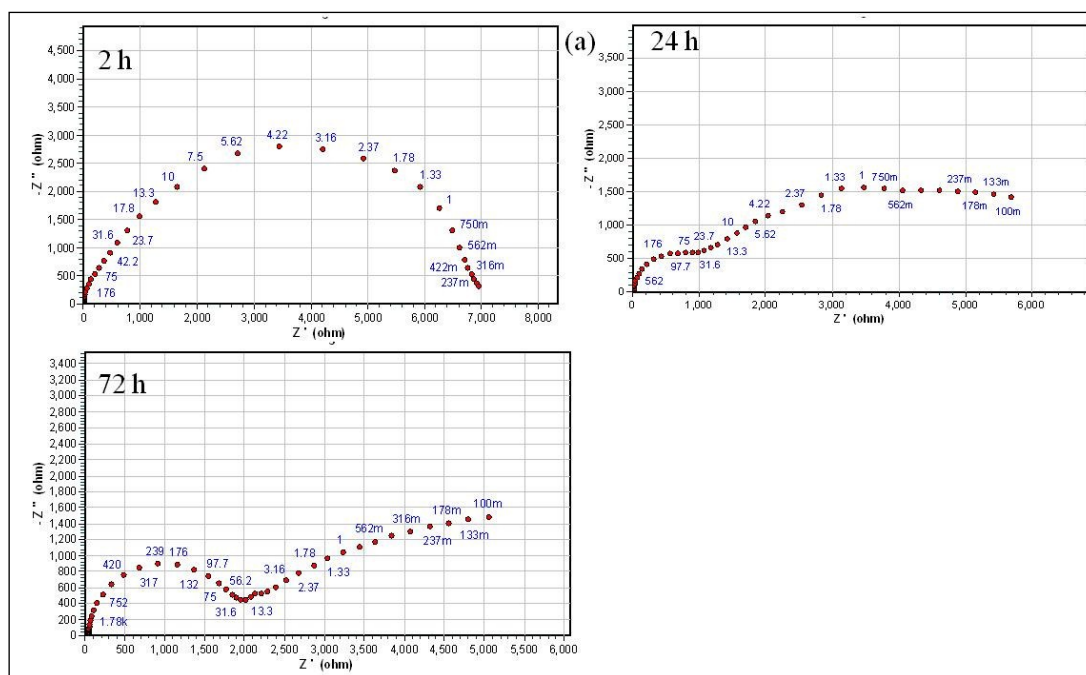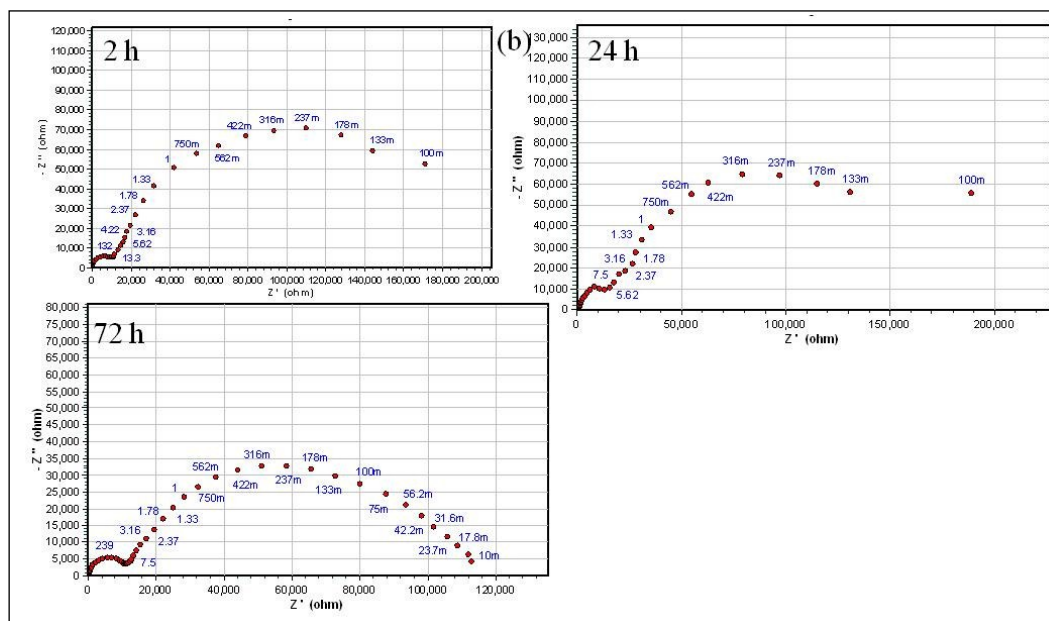

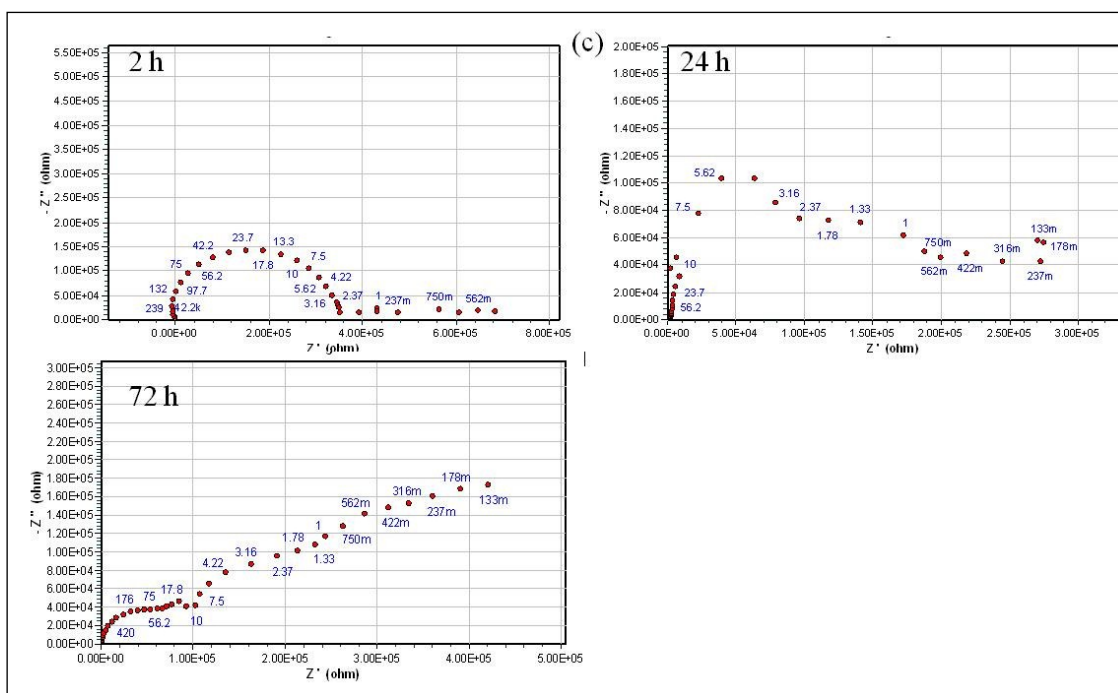

Figure S2 c Nyquist plot of the E-LNP-1.0 coatings

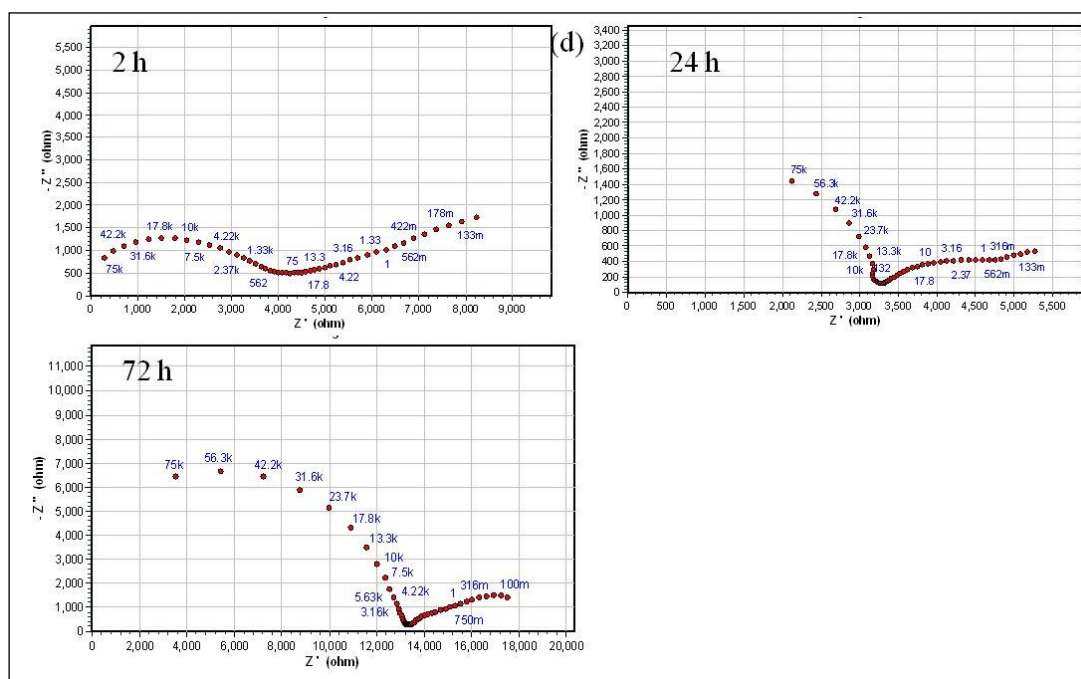

Figure S2 d Nyquist plot of the E-LNP-1.5 coatings

**Table S1** Physico-mechanical studies

| Sample    | Impact test | Pencil Scratch Hardness Test | Cross hatch adhesion test |
|-----------|-------------|------------------------------|---------------------------|
| Epoxy     | pass        | 4h                           | pass                      |
| E-LNP-0.5 | pass        | 4h                           | pass                      |
| E-LNP-1.0 | pass        | 6h                           | pass                      |
| E-LNP-1.5 | pass        | 6h                           | pass                      |

**Table S2.** EIS parameters after equivalent circuit fitting

| Sample    | Time(h) | $R_s$ (ohm) | $R_p$ (ohm) | $C_c$ (F)  | $R_{ct}$ (ohm) | $C_{dl}$ (F) |
|-----------|---------|-------------|-------------|------------|----------------|--------------|
| Epoxy     | 2       | 1.000E-02   | 6.314E+001  | 7.827E-009 | 1.420E+01      | 2.155E-07    |
| Epoxy     | 12      | 3.292E+02   | 1.378E+04   | 7.392E-08  | 2.452E+05      | 2.161E-06    |
| Epoxy     | 24      | 9.105E+02   | 2.242E+04   | 3.847E-007 | 1.375E+05      | 3.210E-06    |
| Epoxy     | 48      | 3.456E+02   | 1.196E+04   | 7.662E-08  | 6.972E+04      | 3.752E-06    |
| Epoxy     | 72      | 3.626E+02   | 1.264E+04   | 5.542E-08  | 8.342E+05      | 4.700E-06    |
| E-LNP-0.5 | 2       | 1.352E+01   | 1.640E+05   | 2.396E-06  | 5.062E+03      | 5.180E-06    |
| E-LNP-0.5 | 12      | 2.587E+01   | 1.686E+03   | 9.825E-07  | 5.618E+03      | 1.732E-05    |
| E-LNP-0.5 | 24      | 2.739E+01   | 1.455E+03   | 1.020E-06  | 4.719E+04      | 2.940E-05    |
| E-LNP-0.5 | 48      | 2.583E+01   | 1.168E+03   | 1.104E-06  | 3.631E+03      | 9.693E-05    |
| E-LNP-0.5 | 72      | 5.404E+01   | 2.046E+03   | 3.698E-07  | 2.806E+01      | 7.189E-05    |
| E-LNP-1.0 | 2       | 1.000E-02   | 7.898E+02   | 4.881E-09  | 4.488E+05      | 2.135E-08    |
| E-LNP-1.0 | 12      | 2.116E+02   | 1.604E+05   | 6.067E-09  | 6.933E+05      | 1.255E-08    |
| E-LNP-1.0 | 24      | 6.605E+01   | 1.882E+03   | 5.541E-09  | 2.329E+05      | 2.507E-07    |
| E-LNP-1.0 | 48      | 8.222E+02   | 8.775E+04   | 1.045E-08  | 3.031E+05      | 3.710E-07    |
| E-LNP-1.0 | 72      | 1.235E+02   | 1.944E+03   | 4.878E-09  | 2.084E+05      | 5.140E-07    |
| E-LNP-1.5 | 2       | 2.606E+02   | 3.723E+03   | 3.143E-09  | 3.134E+03      | 1.222E-05    |
| E-LNP-1.5 | 12      | 1.857E+02   | 4.231E+05   | 3.223E-07  | 4.028E+03      | 1.312E-06    |
| E-LNP-1.5 | 24      | 7.866E+02   | 2.651E+03   | 8.390E-010 | 1.932E+03      | 3.538E-05    |
| E-LNP-1.5 | 48      | 5.258E+03   | 7.103E+03   | 3.847E-010 | 1.885E+03      | 3.883E-05    |
| E-LNP-1.5 | 72      | 1.000E-02   | 1.350E+04   | 4.878E-09  | 4.618E+03      | 6.036E-05    |

1. ur Rahman, O.; Ahmad, S., Physico-mechanical and electrochemical corrosion behavior of soy alkyd/Fe<sub>3</sub>O<sub>4</sub> nanocomposite coatings. *RSC Advances* **2014**, 4 (29), 14936-14947.
2. Brasher, D.; Kingsbury, A., Electrical measurements in the study of immersed paint coatings on metal. I. Comparison between capacitance and gravimetric methods of estimating water-uptake. *Journal of Chemical Technology and Biotechnology* **1954**, 4 (2), 62-72.
